# Supplementary material
Source: PubMed Central journal article supplement (PMC6467480)
Supplement: NIHMS1014452-supplement-SI.pdf [file NIHMS1014452-supplement-SI.pdf]

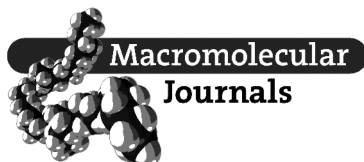

## Supporting Information

for *Macromol. Biosci.*, DOI: 10.1002/mabi.201800127

**A General Strategy for Extrusion Bioprinting of Bio-Macromolecular Bioinks through Alginate-Templated Dual-Stage Crosslinking**

**Kai Zhu, Nan Chen, Xiao Liu, Xuan Mu, Weijia Zhang, Chunsheng Wang, and Yu Shrike Zhang\***

Supporting Information

## **A General Strategy for Extrusion Bioprinting of Biomacromolecular Bioinks through Alginate-Templated Dual-Stage Crosslinking**

*Kai Zhu<sup>1,2,†</sup>, Nan Chen<sup>1,2,†</sup>, Xiao Liu<sup>3</sup>, Xuan Mu<sup>4</sup>, Weijia Zhang<sup>5</sup>, Chunsheng Wang<sup>1,2</sup>, Yu Shrike Zhang<sup>4,\*</sup>*

<sup>1</sup>Department of Cardiac Surgery, Zhongshan Hospital, Fudan University, Shanghai 200032, P. R. China

<sup>2</sup>Shanghai Institute of Cardiovascular Disease, Shanghai 200032, P. R. China

<sup>3</sup>Key Laboratory for Biomechanics and Mechanobiology of the Ministry of Education, School of Biological Science and Medical Engineering, Beihang University, Beijing 100191, P. R. China

<sup>4</sup>Division of Engineering in Medicine, Brigham and Women's Hospital, Harvard Medical School, Cambridge, MA 02139, USA

<sup>5</sup>Department of Chemistry and Institute of Biomedical Science, Fudan University, Shanghai 200433, P. R. China

\*Correspondence to: Yu Shrike Zhang ([yszhang@research.bwh.harvard.edu](mailto:yszhang@research.bwh.harvard.edu))

<sup>†</sup>Kai Zhu and Nan Chen contributed equally to this work.

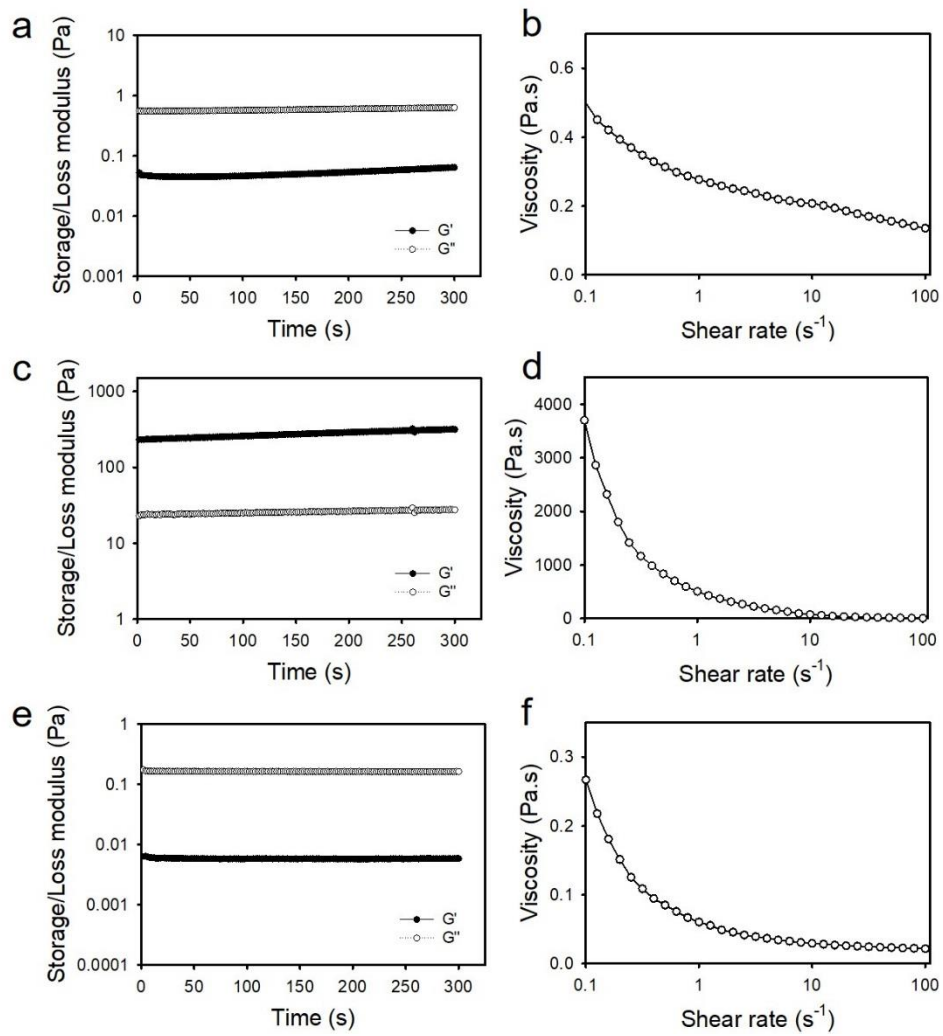

**Figure S1.** Rheological characterizations of (a, b) GelMA (7% w/v)-alginate (2% w/v), (c, d) gelatin (10% w/v)-alginate (2% w/v), and (e, f) collagen (1 mg mL<sup>-1</sup>)-alginate (2% w/v) bioinks.

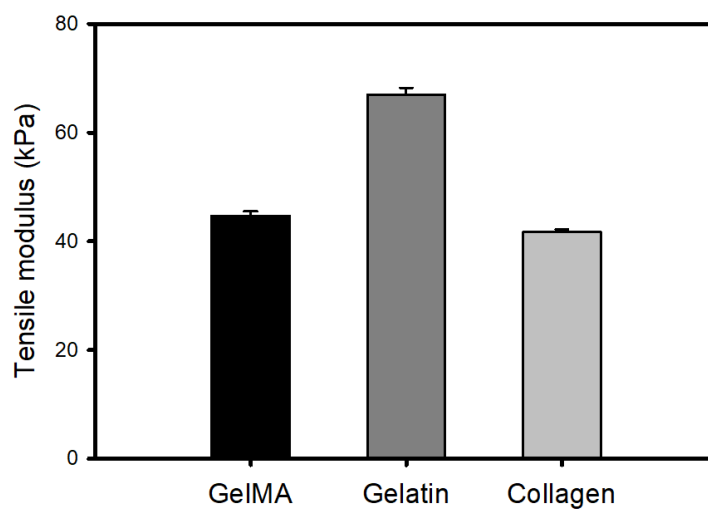

**Figure S2.** Tensile moduli of the GelMA (7% w/v)-alginate (2% w/v), gelatin (10% w/v)-alginate (2% w/v), and collagen (1 mg mL<sup>-1</sup>)-alginate (2% w/v) constructs. The constructs were crosslinked using the same conditions as in respective bioprinting, followed by alginate removal by soaking in an EDTA solution.
